# Supplementary material for: Electrochemical behavior of carbon nanorod arrays having different graphene orientations and crystallinity
Source: Royal Society of Chemistry journal article supplement (doi:10.1039/b900747d), 2009-01-01
Supplement: b900747d.pdf [file b900747d.pdf]

### **Cyclic voltammetric behavior of Ac-Ni**

In addition to the redox peaks of ferri/ferro hexacyanide ions, a pair of undefined peaks was observed at the voltage around 0.7 V in Fig. 7e. These peaks can be ascribed to the redox reactions of nickel-containing compounds eluted from Ni metals, since these peaks were observed in another experiment using a pure Ni plate as a working electrode. Pinholes, such as broken nanorods would be the reason why such peaks were observed, but such broken ones were rarely found by the SEM observation. In addition,  $\Delta E_p$  was far larger for CVD-Ni than the case with the Ni plate (for example,  $\Delta E_p$  was 162 mV for CVD-Ni, and was 80 mV for the Ni plate at the sweeping rate of  $100 \text{ mVs}^{-1}$ ), suggesting that the surface of CVD-PVC is less active than the Ni plate. These facts indicate that the electrochemical reactions mainly occurred on the surface of the carbon covering the Ni core.
